# Supplementary material
Source: PubMed Central journal article supplement (PMC3989103)

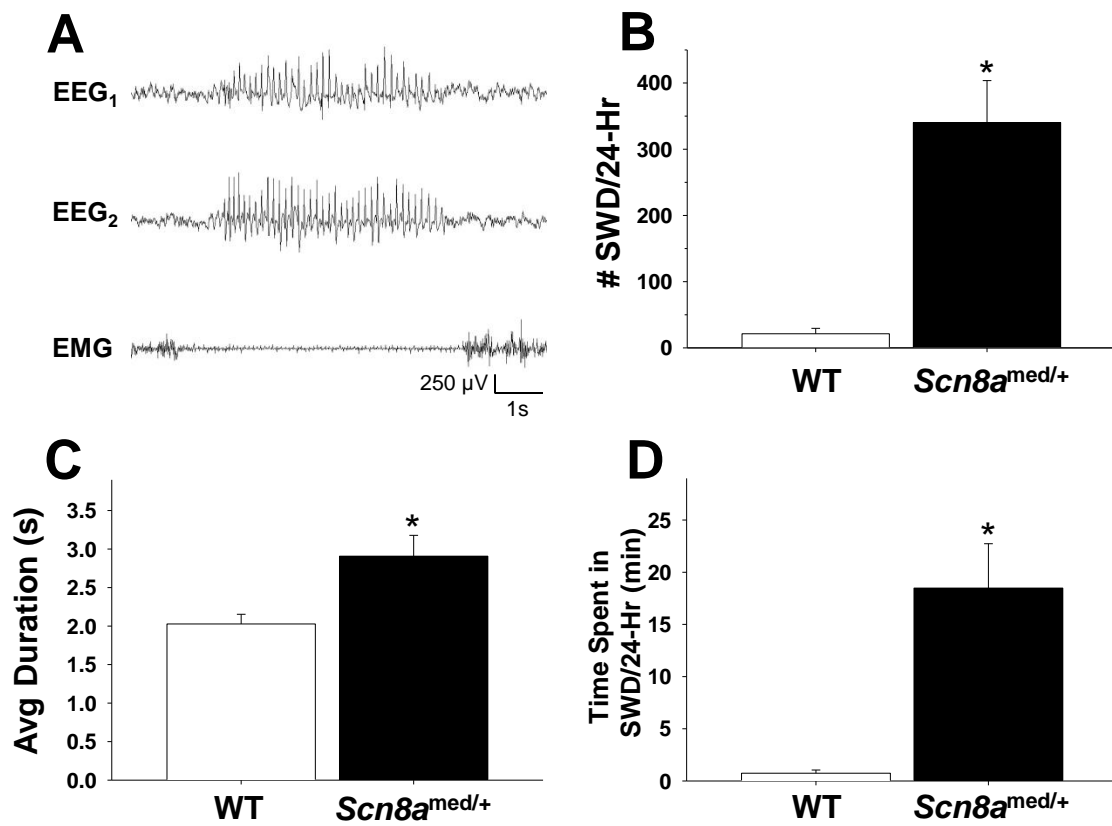

Supplementary Figure 1

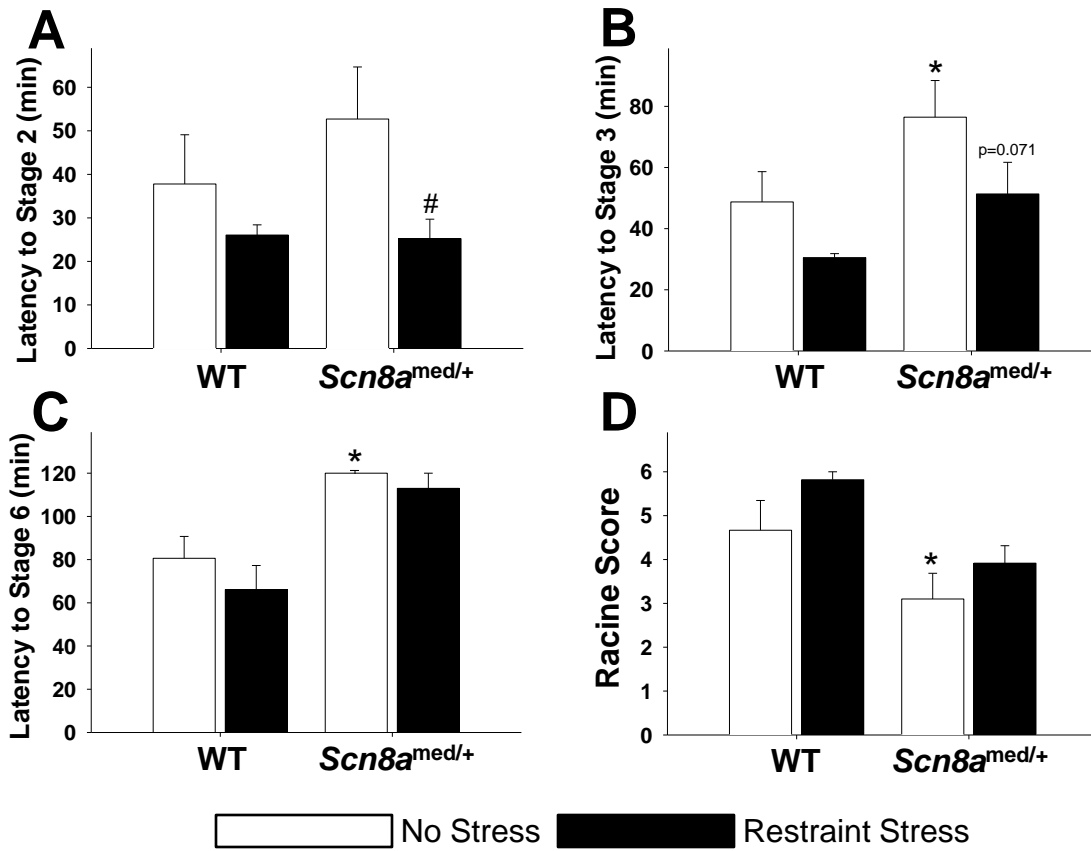

Supplementary Figure 2

Supplement: NIHMS532841-supplement-02.pdf [file NIHMS532841-supplement-02.pdf]
